# Supplementary material
Source: PubMed Central journal article supplement (PMC7409772)

n: 52,800

Leadership quality score

Items

- Q1 How often does your immediate manager explain the company's objectives so you understand what they mean for your work tasks?
- Q2 How often do you have sufficient authority in relation to your responsibilities at work?
- Q3 How often does your immediate manager take the time to engage in your professional development?
- Q4 How often does your immediate manager involve you in the planning of your work?
- Q5 How often does your immediate manager give you the necessary feedback (praise and criticism) for your work?
- Q6 How often is your work recognized and appreciated by the management?
- Q7 How often do you get the necessary help and support from your immediate manager?
- Q8 How often can you trust the information that comes from the management?

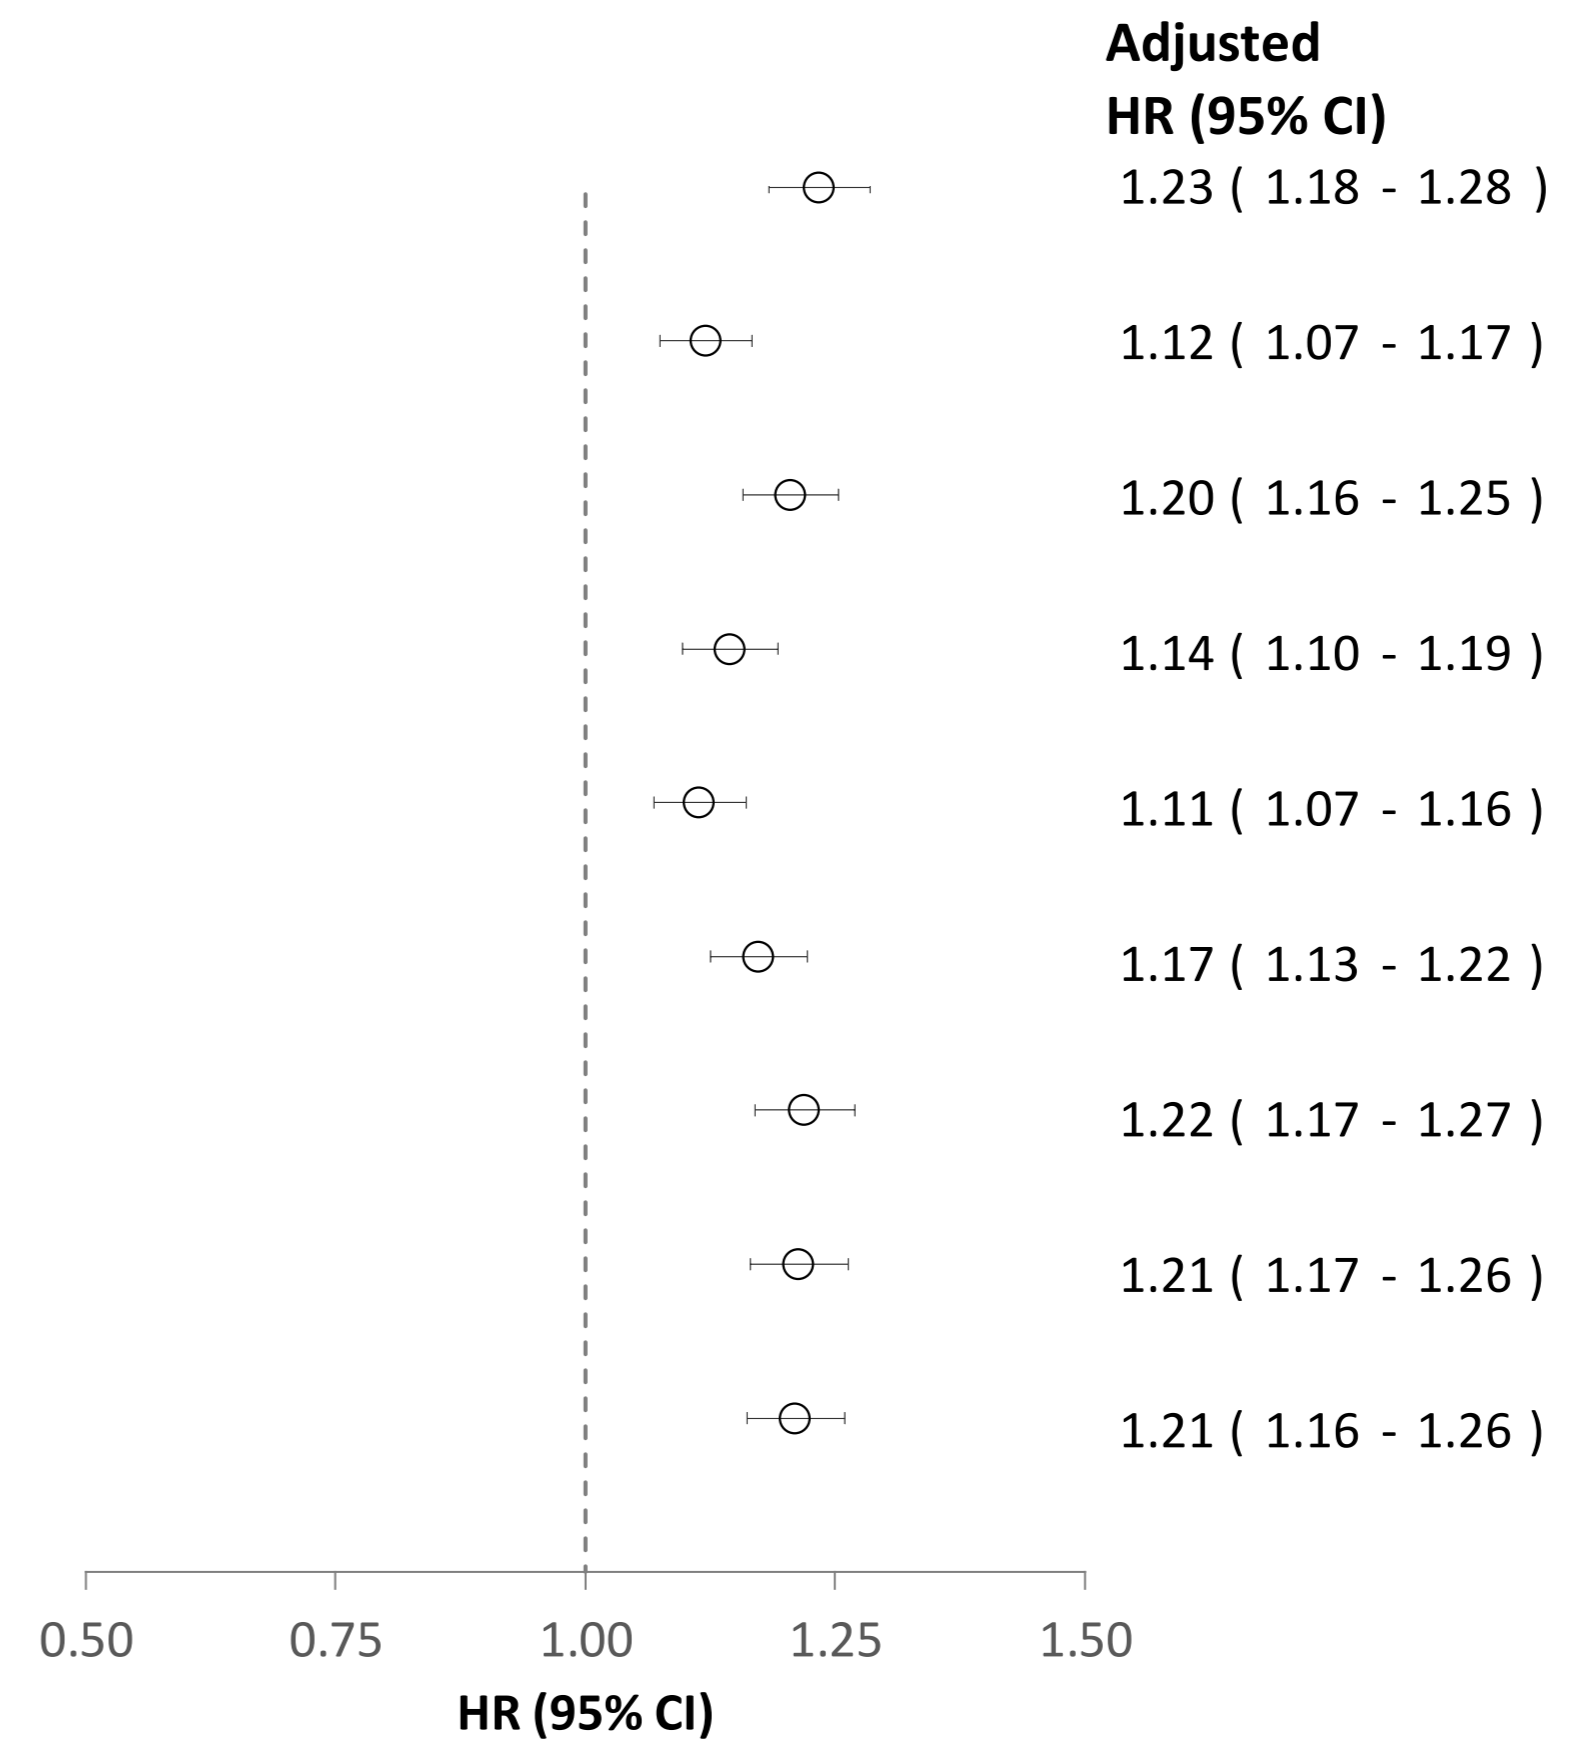

Supplement: joem-62-0557-s002.pdf [file joem-62-0557-s002.pdf]
